# Supplementary material
Source: publisher figshare collection journal article supplement (https://geolsoc.figshare.com/ndownloader/files/5422856)
Supplement: Supplementary file 1 [file 5422856]

Table 4a Composition of clinopyroxene of the Huangshan and Hugnshandong complexes
Complex	Sample	Rock type	wt%
			SiO2	TiO2	Al2O3	FeO	MnO	MgO	CaO	Na2O	Cr2O3	NiO	Total
Huangshan	XH05-3-8	Hornblende harzburgite	55.1	0.30	2.95	3.53	0.11	15.8	23.4	0.40	1.00	0.01	102.6
	XH05-3-9		54.6	0.42	3.50	3.74	0.11	15.9	22.9	0.47	0.83	0.00	102.5
	XH05-5-1	Hornblende harzburgite	55.0	0.56	3.49	4.06	0.15	16.3	21.7	0.33	1.13	0.12	102.8
	XH05-5-2		55.7	0.60	2.87	4.02	0.12	16.6	22.1	0.32	0.98	0.03	103.4
	XH05-5-10		54.5	0.60	3.78	3.81	0.10	15.7	22.4	0.42	0.99	0.00	102.4
	XH05-24-5	Hornblende harzburgite	53.5	0.57	4.16	4.54	0.13	16.3	21.8	0.38	1.05	0.03	102.4
	XH05-24-6		52.5	0.74	4.53	4.68	0.15	15.8	21.9	0.36	0.96	0.03	101.7
	XH05-24-7		54.0	0.34	3.35	4.27	0.16	15.1	22.9	0.34	0.85	0.00	101.4
	XH05-27-5	Hornblende harzburgite	51.3	0.36	3.42	4.84	0.10	16.6	21.3	0.33	1.14	0.02	99.4
	XH05-27-6		50.1	0.28	3.14	4.41	0.13	16.3	21.3	0.40	1.09	0.03	97.1
	XH05-27-7		50.2	0.29	3.17	4.74	0.08	16.1	20.7	0.36	1.33	0.22	97.2
	XH05-27-8		50.4	0.42	4.07	4.73	0.17	16.4	21.2	0.19	1.10	0.02	98.7
	XH05-27-10		50.3	0.59	4.35	4.88	0.12	15.8	21.5	0.32	1.01	0.01	98.9
	XH05-33-1	Hornblende lherzolite	53.2	0.40	3.47	4.74	0.12	16.5	22.6	0.42	0.54	0.01	102.0
	XH05-33-2		53.2	0.34	2.58	4.73	0.13	16.9	21.0	0.26	0.82	0.01	99.9
	XH05-33-4		53.2	0.33	1.98	4.44	0.13	16.0	22.5	0.36	0.49	0.01	99.5
	XH05-33-6		52.4	0.38	3.57	4.43	0.10	15.7	22.3	0.45	0.55	0.00	99.8
	XH05-28-1	Hornblende lherzolite	53.0	0.17	2.72	4.23	0.12	15.9	22.1	0.50	0.67	0.00	99.4
	XH05-28-5		51.6	0.29	2.78	4.39	0.13	16.7	20.8	0.41	0.90	0.03	98.0
	XH05-28-7		52.7	0.31	2.37	4.94	0.14	16.7	20.7	0.30	0.57	0.00	98.7
	XH05-11-2	Hornblende lherzolite	53.6	0.09	1.90	4.64	0.16	16.6	22.3	0.34	0.17	0.02	99.8
	XH05-11-3		52.4	0.35	2.58	4.76	0.16	16.1	21.9	0.44	0.68	0.01	99.4
	XH05-11-4		53.4	0.26	2.03	5.00	0.16	17.6	20.2	0.26	0.60	0.01	99.5
	XH05-9-3	Hornblende lherzolite	53.5	0.36	2.64	4.98	0.13	16.6	21.3	0.33	1.00	0.03	100.9
	XH05-9-6		53.8	0.41	2.27	4.89	0.12	17.1	21.7	0.29	0.36	0.01	100.9
	XH05-9-7		53.8	0.42	3.32	4.53	0.15	14.5	23.4	0.36	0.71	0.00	101.2
	XH09-19-1	Hornblende olivine websterite	55.3	0.36	3.02	4.76	0.12	15.8	22.0	0.44	0.45	0.01	102.2
	XH09-19-2		52.9	0.40	2.52	4.96	0.13	16.8	20.6	0.33	0.85	0.01	99.5
	XH09-19-4		52.9	0.37	2.69	4.49	0.14	16.2	21.9	0.33	0.79	0.01	99.8
	XH09-19-6		52.5	0.12	2.62	4.59	0.14	16.1	22.3	0.27	0.31	0.01	98.9
	XH09-19-8		52.7	0.05	2.23	4.60	0.10	16.5	22.2	0.37	0.21	0.01	99.0
	XH09-20-8	Hornblende olivine websterite	53.4	0.04	1.77	4.41	0.11	16.0	22.6	0.33	0.33	0.05	99.0
	XH09-20-9		53.8	0.10	1.93	4.55	0.10	16.7	22.6	0.31	0.21	0.01	100.4
	XH09-20-12		52.1	0.34	2.60	5.03	0.13	16.0	20.7	0.25	0.81	0.00	98.0
	XH09-20-13		54.3	0.03	1.23	4.22	0.14	16.2	22.9	0.33	0.19	0.00	99.6
	XH09-22-5	Hornblende olivine websterite	53.2	0.37	3.02	4.65	0.13	15.9	22.1	0.39	0.64	0.00	100.4
	XH09-22-6		52.5	0.29	2.49	4.44	0.14	15.6	22.8	0.40	0.45	0.00	99.1
	XH09-22-7		54.0	0.09	2.33	4.71	0.33	16.6	22.2	0.31	0.19	0.24	101.0
	XH09-22-8		54.1	0.10	1.40	4.74	0.13	16.6	22.5	0.34	0.20	0.00	100.2
	XH09-23-2	Hornblende olivine websterite	53.9	0.15	1.97	4.52	0.14	16.6	22.7	0.31	0.29	0.04	100.6
	XH09-23-3		52.5	0.16	2.83	4.50	0.14	15.7	22.1	0.38	0.44	0.03	98.8
	XH09-23-5		53.2	0.02	1.96	4.56	0.13	16.7	22.6	0.35	0.12	0.00	99.7
	XH09-25-1	Hornblende olivine websterite	53.9	0.09	1.17	4.33	0.14	16.7	22.8	0.25	0.19	0.01	99.6
	XH09-25-4		54.1	0.12	1.75	4.57	0.12	16.2	22.6	0.36	0.36	0.01	100.3
	XH09-25-5		52.7	0.18	2.88	4.81	0.14	15.9	22.3	0.36	0.49	0.00	99.8
	XH09-26-6	Hornblende olivine websterite	55.5	0.07	1.25	4.60	0.14	16.4	23.0	0.25	0.16	0.00	101.3
	XH09-26-12		55.0	0.07	1.67	4.59	0.13	16.7	23.2	0.31	0.30	0.02	102.0
	XH09-26-14		53.2	0.35	2.48	4.83	0.13	16.6	21.6	0.33	0.48	0.01	100.0
	XH09-26-17		53.6	0.11	2.31	4.43	0.12	16.6	22.5	0.29	0.16	0.00	100.1
Huangshandong	XH04-12-8	Hornblende lherzolite	51.5	0.49	3.71	5.32	0.13	16.2	20.4	0.43	1.01	0.03	99.2
	XH04-12-9		52.5	0.62	2.97	5.20	0.15	15.9	21.7	0.36	0.83	0.01	100.2
	XH04-12-10		51.6	0.48	2.84	5.17	0.12	15.9	21.8	0.41	1.04	0.03	99.3
	XH04-18-12	Hornblende harzburgite	50.9	0.87	3.84	5.20	0.14	15.7	20.5	0.60	0.86	0.01	98.6
	XH04-18-16		51.2	0.87	3.92	4.83	0.14	15.7	21.0	0.66	1.05	0.01	99.4
	XH04-18-17		51.4	0.90	3.77	4.70	0.16	15.6	20.5	0.69	0.86	0.01	98.7
	XH04-20-9	Hornblende harzburgite	51.5	0.62	2.95	5.02	0.13	15.5	21.9	0.46	0.76	0.00	98.8
	XH04-20-11		51.5	0.68	3.35	4.76	0.11	16.2	21.1	0.45	1.00	0.00	99.2
	XH04-20-12		51.5	0.87	4.06	5.14	0.14	15.3	21.0	0.53	0.99	0.03	99.7
	XH04-23-5	Hornblende harzburgite	50.4	0.98	4.50	5.03	0.11	15.4	21.4	0.47	0.99	0.04	99.2
	XH04-23-9		51.2	0.85	4.03	4.52	0.12	15.4	21.3	0.52	1.02	0.00	99.0
	XH04-23-10		51.8	0.72	3.34	5.00	0.13	15.7	21.5	0.57	0.90	0.03	99.7
	XH04-26-4	Hornblende harzburgite	51.8	1.17	3.55	4.98	0.10	15.5	21.5	0.62	0.74	0.01	99.9
	XH04-26-5		53.0	0.30	2.34	4.91	0.06	16.0	22.0	0.41	0.47	0.00	99.6
	XH04-26-7		50.6	1.22	4.61	4.56	0.10	15.8	20.9	0.80	0.90	0.02	99.5
	XHD08-1-15	Hornblende harzburgite	51.6	0.77	4.12	5.09	0.12	16.0	20.5	0.45	1.03	0.04	99.7
	XHD08-1-16		51.3	0.82	4.28	5.11	0.13	15.9	20.5	0.42	1.07	0.04	99.6
	XHD08-1-17		51.4	0.76	4.05	5.06	0.11	15.8	20.8	0.43	1.00	0.05	99.5
	XHD08-4-3	Hornblende harzburgite	51.1	0.66	3.79	5.49	0.12	16.7	19.7	0.36	0.95	0.01	98.8
	XHD08-4-4		51.4	0.74	4.21	5.14	0.13	16.5	20.6	0.36	0.99	0.03	100.0
	XHD08-4-5		50.8	0.64	3.92	4.83	0.12	14.8	21.5	0.45	1.03	0.00	98.1
	XHD08-5-12	Hornblende harzburgite	52.0	0.63	3.75	4.94	0.11	16.4	20.6	0.36	1.01	0.05	99.8
	XHD08-5-14		51.1	0.84	4.10	5.36	0.11	16.4	20.3	0.40	0.94	0.04	99.5
	XHD08-5-15		52.1	0.61	3.74	4.85	0.22	15.6	21.6	0.01	0.95	0.11	99.8
	XHD08-9-8	Hornblende harzburgite	53.3	0.33	2.33	4.94	0.11	15.7	21.8	0.44	0.47	0.01	99.4
	XHD08-9-10		52.0	0.84	3.57	4.37	0.11	15.9	22.0	0.70	0.71	0.03	100.2
	XHD08-9-12		52.1	0.95	3.26	4.95	0.09	15.1	21.7	0.66	0.71	0.02	99.6
Huangshannan	ZK2205-11-1	Hornblende harzburgite	55.61	0.52	4.63	3.64	0.05	21.15	12.56	1.50	0.77		100.5
	ZK2205-11-2		55.75	0.32	4.41	3.69	0.07	20.99	12.14	1.54	0.73		99.7
	ZK2205-11-4		56.69	0.08	3.42	3.53	0.10	21.97	11.82	1.09	0.52		99.3
	ZK2205-11-6		55.95	0.20	4.22	3.68	0.09	21.36	11.96	1.48	0.48		99.5
	ZK2205-29-1	Dunite	51.21	0.57	3.95	3.23	0.09	16.23	21.70	0.42	1.10		98.5
	ZK2205-29-2		50.82	0.67	4.18	3.73	0.13	17.19	20.19	0.41	1.13		98.4
	ZK2205-29-3		51.40	0.56	3.87	3.53	0.10	17.16	20.27	0.48	1.06		98.4
	ZK2205-29-4		54.11	0.47	3.84	3.18	0.11	15.83	21.36	0.49	1.06		100.4
	ZK2205-29-5		53.21	0.50	4.13	4.06	0.10	17.05	19.92	0.41	1.17		100.5
	ZK2205-29-6		51.40	0.62	4.28	3.89	0.12	17.00	20.33	0.30	1.18		99.1
	ZK2205-29-7		51.21	0.56	3.95	3.95	0.10	17.40	19.77	0.37	1.18		98.5
